# Supplementary material for: Identification of Cdca7 as a novel Notch transcriptional target involved in hematopoietic stem cell emergence
Source: PubMed Central journal article supplement — J Exp Med. 2014 Nov 17;211(12):2411–23. doi: 10.1084/jem.20131857 (PMC4235648; doi:10.1084/jem.20131857), 2014-11-17
Supplement: supp_jem.20131857_JEM_20131857_sm.pdf [file supp_jem.20131857_JEM_20131857_sm.pdf]

SUPPLEMENTAL MATERIAL

Guiu et al., <http://www.jem.org/cgi/content/full/jem.20131857/DC1>

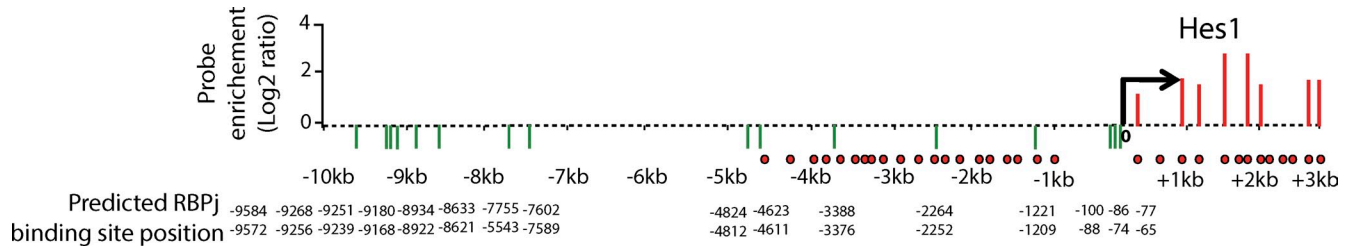

**Figure S1. Hes1 predicted RBPj-binding sites.** This figure is related to Fig. 2. (A) Schematic representation of the promoter region of *Cdca7* showing the array probe position (red circles), DNA (black dashed line), TSS (black arrow), putative RBPj-binding site (green bars), and probe enrichment in log<sub>2</sub> ratio (red bars). RBPj-binding sites were identified with the Genomatix and STORM software scanning from the -10- to 0-kb region of each target gene.

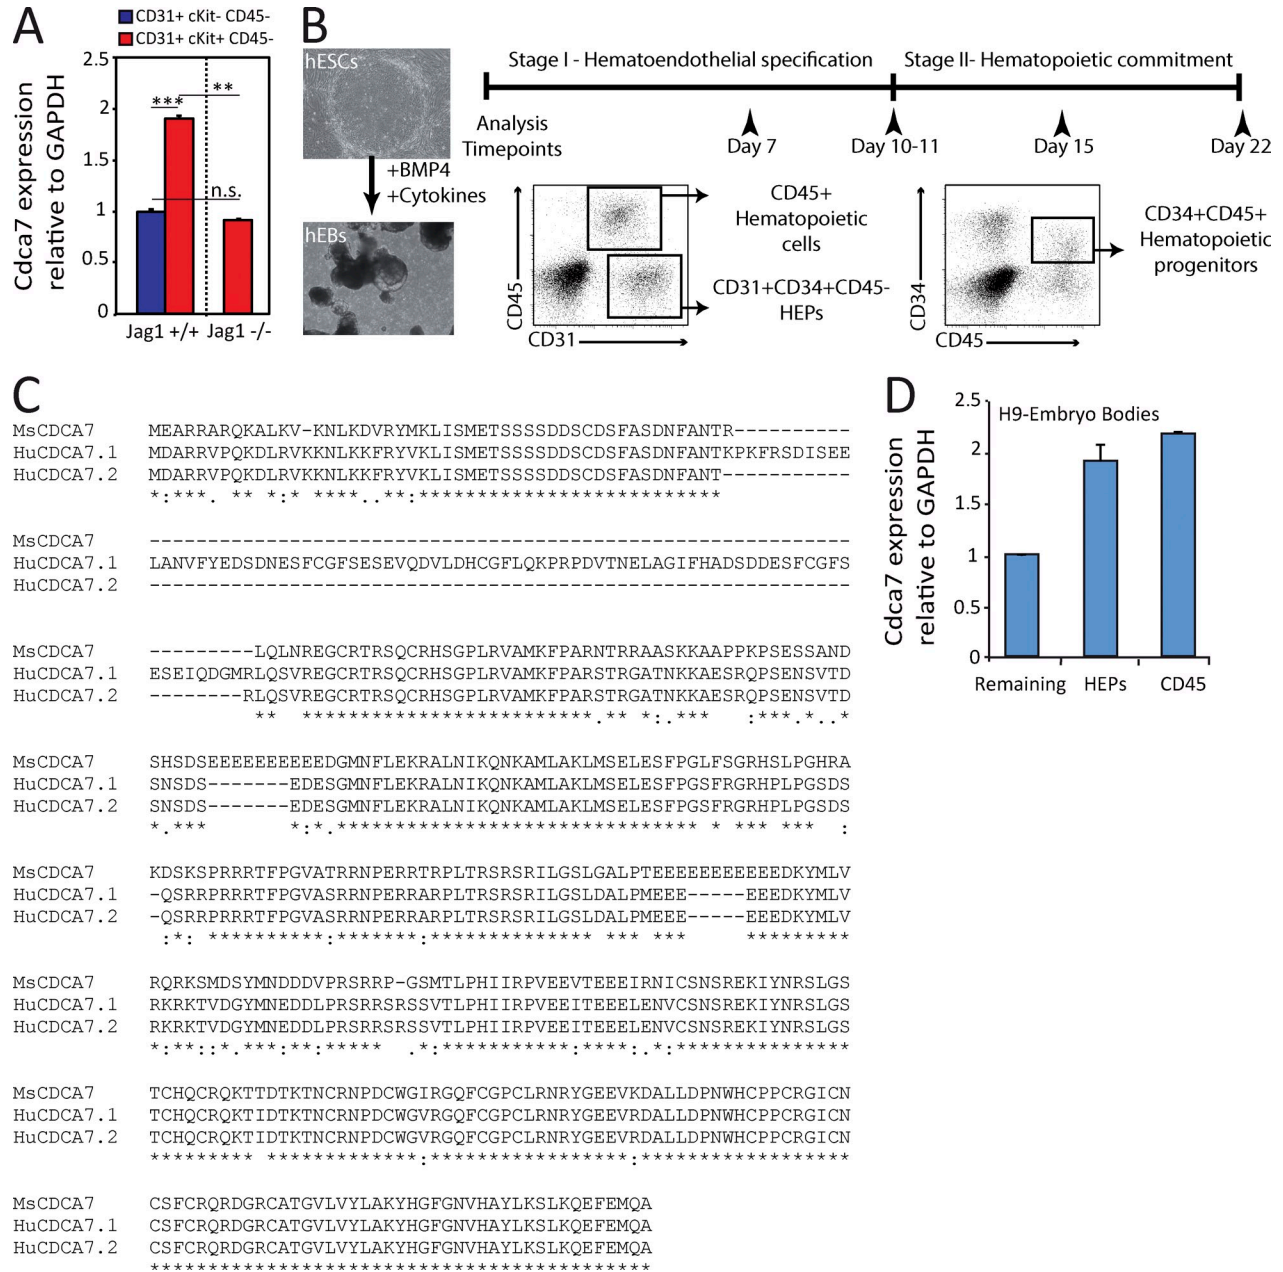

**Figure S2. Cdc7 is expressed in human and mouse hematopoietic progenitors.** This figure is related to Fig. 3. (A) Cdc7 expression from sorted CD31+cKit-CD45- and CD31+Kit+CD45- populations derived from E10.5 *Jag1*<sup>+/+</sup> and *Jag1*<sup>-/-</sup> dissected AGMs. (B) Experimental design depicting hESC differentiation toward blood in EB system. (C) Clustal alignment to compare the mouse *Cdc7* with its human homologue variants. Asterisks indicate positions for fully conserved residues; colons indicate conservation between groups of strongly similar properties, scoring >0.5 in the Gonnet PAM 250 matrix; and periods indicate conservation between groups of weakly similar properties, scoring ≤0.5 in the Gonnet PAM 250 matrix. (C and D) *Cdc7v2* in sorted subpopulations (D) was analyzed by qPCR. (A and D) Error bars represent the SD (\*\*, P < 0.01; \*\*\*, P < 0.001; n.s., not significant).

Table S1, included as a separate PDF file, shows Chipper- and iChip-identified RBPj target genes.

**Table S2.** Mouse expression RT-PCR primers

| Name  | Forward                       | Reverse                       | Used in     |
|-------|-------------------------------|-------------------------------|-------------|
| Cdca7 | 5'-ATGATGTGCCCAAGTCGGAG-3'    | 5'-GCAGTTGGTTTTGGTGTCACTGG-3' | Fig. 2, B-D |
| Wasf1 | 5'-TGTGTAACCAACATTTCCCTGGC-3' | 5'-CTAACAGACAATCGGTCCACGC-3'  | Fig. 2, B-D |
| Ect2  | 5'-ACGACAGCGTGTACCATCTCC-3'   | 5'-CCTGCCGCATTTCTTCATCAAC-3'  | Fig. 2, B-D |
| Hes1  | 5'-CGGCATTCCAAGCTAGAGAAGG-3'  | 5'-GGTAGGTCATGGCGTTGATCTG-3'  | Fig. 2, B-D |
| Gata2 | 5'-ACACACCACCCGATACCCACC-3'   | 5'-CCACAGGCGTTGCACACAGG-3'    | Fig. 2 C    |
| Dll4  | 5'-AAGGTGCCACTTCGGTTACAC-3'   | 5'-AGATGCCACAGGAGCTACAG-3'    | Fig. 2 C    |

**Table S3.** Human expression RT-PCR primers

| Name      | Forward                    | Reverse                    | Used in         |
|-----------|----------------------------|----------------------------|-----------------|
| Cdca7 v.2 | 5'-GATCTGGGCACCCGCCACCA-3' | 5'-TGAAGTGCAGCCTCGTGTTC-3' | Fig. 3, H and I |

**Table S4.** Promoter mouse primers

| Name                  | Forward                         | Reverse                       | Used in         |
|-----------------------|---------------------------------|-------------------------------|-----------------|
| Cdca7 (-592/-423)     | 5'-CCTTCGGAGAGGCTTTACTCAAC-3'   | 5'-AGAACAGAACGGGATACCACC-3'   | Fig. 2, A and B |
| Ect2                  | 5'-AACCTCCTTTTGATAGGCTGGAAC-3'  | 5'-CGGATTTGAAACACACTACAACC-3' | Fig. 2, A and B |
| Hes1                  | 5'-GCCGCCAGACCTTGTGCCTA-3'      | 5'-TCCAGATCCTGTGTGATCCGC-3'   | Fig. 2, A and B |
| Wasf1                 | 5'-GGGAAATGTAGTTTGGAGCGAGG-3'   | 5'-TCGGGAATGAGGGAAGATGAC-3'   | Fig. 2, A and B |
| Gnai1                 | 5'-TGTAGGCTTAGGTAAAGAACCGTGG-3' | 5'-AAGGGAGGAAGTGAGCATTGGC-3'  | Fig. 2 A        |
| Gna12                 | 5'-GAATGACCCTTGTTCATGCTG-3'     | 5'-TTATCCTTCTTGACCCGTCTCCC-3' | Fig. 2 A        |
| Fbxl19                | 5'-CTTGTTAGTCATTCTTCCCCTCC-3'   | 5'-CCACCTTTACTTTCCAGGACGAG-3' | Fig. 2 A        |
| R28S                  | 5'-GAGCCTAGAGATGGGCTGTG-3'      | 5'-CTGGGACATAGTGGGTGCTT-3'    | Fig. 2 A        |
| Cdca7 (-393/-166)     | 5'-GCCAAAGTGTGAACGCAGTA-3'      | 5'-GCGGTTCTCGTGGTTGTAAT-3'    | Fig. 3, B-D     |
| Cdca7 (-2,513/-2,316) | 5'-TTCTGCATGCTAAGGGCTTT-3'      | 5'-CTTGCTTCTGTTCCGTCA-3'      | Fig. 3, B-D     |
| Cdca7 (-4,244/-4,016) | 5'-CGTTTCCGTTGATACCGAGT-3'      | 5'-TGACAAATGGAAACCCAGTG-3'    | Fig. 3, B-D     |
| Cdca7 (-7,949/-7,706) | 5'-TGCTTTATGCAGTTGGATGC-3'      | 5'-TGGTTTGCAGTTCATTCCAG-3'    | Fig. 3 B        |
| Cdca7 (-8,899/-9,087) | 5'-TTGCTTGGGTTCAATAAG-3'        | 5'-TTTAGGGCTGCAGGAAAGAA-3'    | Fig. 3 B        |
